# Supplementary material for: A multicentre, randomised intervention study of the Paediatric Early Warning Score: study protocol for a randomised controlled trial
Source: Springer Nature journal article supplement (doi:10.1186/s13063-017-2011-7), 2017-06-08
Supplement: MOESM1 [file 12351522]

## Central Denmark Region PEWS model

|                | Age group | 0 point  | 1 point | 2 point              | 4 point                |
|----------------|-----------|----------|---------|----------------------|------------------------|
| Oxygen Therapy |           | Room air |         | <4 L./minute or <50% | > 4 L./minute or > 50% |

|                    |  |        |               |                   |                            |
|--------------------|--|--------|---------------|-------------------|----------------------------|
| Respiratory Effort |  | Normal | Mild increase | Moderate increase | Severe increase/any apnoea |
| Pulse Oximetry     |  | > 94   | 91 - 94       | < 90              |                            |

|                  |                   |       |                |                |                |
|------------------|-------------------|-------|----------------|----------------|----------------|
| Respiratory Rate | 0 til < 3 months  | 30-60 | 20-29 or 61-80 | 16-19 or 81-90 | 91-150 or 5-15 |
|                  | 3 til < 12 months | 25-50 | 20-24 or 51-70 | 16-19 or 71-80 | 81-150 or 5-15 |
|                  | 1-4 years         | 20-40 | 16-19 or 41-60 | 13-15 or 61-70 | 71-150 or 5-12 |
|                  | >4 - 12 years     | 20-30 | 15-19 or 31-40 | 11-14 or 41-50 | 51-150 or 5-10 |
|                  | > 12 years        | 12-16 | 11 or 17-22    | 10 or 23-29    | 30-150 or 5-9  |

|            |                   |         |                   |                  |                  |
|------------|-------------------|---------|-------------------|------------------|------------------|
| Heart Rate | 0 til < 3 months  | 110-150 | 91-109 or 151-179 | 81-90 or 180-189 | 190-350 or 20-80 |
|            | 3 til < 12 months | 100-150 | 99-81 or 151-169  | 71-80 or 170-179 | 180-350 or 20-70 |
|            | 1-4 years         | 90-120  | 71-89 or 121-149  | 61-70 or 150-169 | 170-350 or 20-60 |
|            | >4 - 12 years     | 70-110  | 61-69 or 111-129  | 51-60 or 130-149 | 150-350 or 20-50 |
|            | > 12 years        | 60-100  | 51-59 or 101-119  | 41-50 or 120-139 | 140-350 or 20-40 |

|                      |  |            |  |  |             |
|----------------------|--|------------|--|--|-------------|
| Capillary Refil Time |  | <3 seconds |  |  | ≥ 3 seconds |
|----------------------|--|------------|--|--|-------------|

|                        |  |       |                  |                 |              |
|------------------------|--|-------|------------------|-----------------|--------------|
| Level of consciousness |  | Alert | Voice responsive | Pain responsive | Unresponsive |
|------------------------|--|-------|------------------|-----------------|--------------|

## Bedside PEWS model

|                | Age group | 0 point  | 1 point | 2 point              | 4 point                |
|----------------|-----------|----------|---------|----------------------|------------------------|
| Oxygen Therapy |           | Room air |         | <4 L./minute or <50% | > 4 L./minute or > 50% |

|                    |  |        |               |                   |                            |
|--------------------|--|--------|---------------|-------------------|----------------------------|
| Respiratory Effort |  | Normal | Mild increase | Moderate increase | Severe increase/any apnoea |
| Pulse Oximetry     |  | > 94   | 91 - 94       | < 90              |                            |

|                  |                 |       |                |                |                |
|------------------|-----------------|-------|----------------|----------------|----------------|
| Respiratory Rate | 0 to < 3 months | 30-60 | 20-29 or 61-80 | 16-19 or 81-90 | 91-150 or 5-15 |
|                  | 3 to <12 months | 25-50 | 20-24 or 51-70 | 16-19 or 71-80 | 81-150 or 5-15 |
|                  | 1-4 years       | 20-40 | 16-19 or 41-60 | 13-15 or 61-70 | 71-150 or 5-12 |
|                  | >4 - 12 years   | 20-30 | 15-19 or 31-40 | 11-14 or 41-50 | 51-150 or 5-10 |
|                  | > 12 years      | 12-16 | 11 or 17-22    | 10 or 23-29    | 30-150 or 5-9  |

|                         |                 |        |                  |                  |                  |
|-------------------------|-----------------|--------|------------------|------------------|------------------|
| Systolic blood pressure | 0 to <3 months  | 60-80  | 51-59 or 81-99   | 46-50 or 100-129 | 130-200 or 30-45 |
|                         | 3 to <12 months | 80-99  | 71-79 or 100-119 | 61-70 or 120-149 | 150-200 or 30-60 |
|                         | 1-4 years       | 90-110 | 76-89 or 111-124 | 66-75 or 125-159 | 160-200 or 30-65 |
|                         | >4 - 12 years   | 90-120 | 81-89 or 121-139 | 71-80 or 140-169 | 170-250 or 30-70 |
|                         | > 12 years      | 100-13 | 86-99 or 131-149 | 76-85 or 150-189 | 190-300 or 30-75 |

|            |                 |         |                   |                  |                  |
|------------|-----------------|---------|-------------------|------------------|------------------|
| Heart Rate | 0 to <3 months  | 110-150 | 91-109 or 151-179 | 81-90 or 180-189 | 190-350 or 20-80 |
|            | 3 to <12 months | 100-150 | 99-81 or 151-169  | 71-80 or 170-179 | 180-350 or 20-70 |
|            | 1-4 years       | 90-120  | 71-89 or 121-149  | 61-70 or 150-169 | 170-350 or 20-60 |
|            | >4 - 12 years   | 70-110  | 61-69 or 111-129  | 51-60 or 130-149 | 150-350 or 20-50 |
|            | > 12 years      | 60-100  | 51-59 or 101-119  | 41-50 or 120-139 | 140-350 or 20-40 |

|                      |  |            |  |  |             |
|----------------------|--|------------|--|--|-------------|
| Capillary Refil Time |  | <3 seconds |  |  | ≥ 3 seconds |
|----------------------|--|------------|--|--|-------------|
