# Supplementary material for: A multicentre, randomised intervention study of the Paediatric Early Warning Score: study protocol for a randomised controlled trial
Source: Springer Nature journal article supplement (doi:10.1186/s13063-017-2011-7), 2017-06-08
Supplement: MOESM2 [file 12351522]

# CLINICAL DECISION SUPPORT

# SEE IT, BECAUSE YOU ARE LOOKING FOR IT!

| LOOK – LISTEN - FEEL        | Assess the patient – symptoms?                                                                                                                                                                                                                                                                                                                                                                                                                                                                                                                                                                                                                                                                                                                                                                                                                                                                                                                                                                   | Possible causes                                                                                                                                                                                                                                                                                                                                                                                                                                                 | Suggestions for action - Assess the need for help!                                                                                                                                                                                                                                                                                                                                                                                                                                                                                                                                                                                                                                                                                                                                                                                                                                                                                                                                               |
|-----------------------------|--------------------------------------------------------------------------------------------------------------------------------------------------------------------------------------------------------------------------------------------------------------------------------------------------------------------------------------------------------------------------------------------------------------------------------------------------------------------------------------------------------------------------------------------------------------------------------------------------------------------------------------------------------------------------------------------------------------------------------------------------------------------------------------------------------------------------------------------------------------------------------------------------------------------------------------------------------------------------------------------------|-----------------------------------------------------------------------------------------------------------------------------------------------------------------------------------------------------------------------------------------------------------------------------------------------------------------------------------------------------------------------------------------------------------------------------------------------------------------|--------------------------------------------------------------------------------------------------------------------------------------------------------------------------------------------------------------------------------------------------------------------------------------------------------------------------------------------------------------------------------------------------------------------------------------------------------------------------------------------------------------------------------------------------------------------------------------------------------------------------------------------------------------------------------------------------------------------------------------------------------------------------------------------------------------------------------------------------------------------------------------------------------------------------------------------------------------------------------------------------|
| <p><b>A Airways</b></p>     | <p><b>Patent?</b></p> <ul style="list-style-type: none"> <li>• Free respiration without stridor, hoarseness, snoring or rattling secretions</li> </ul> <p><b>At risk?</b></p> <ul style="list-style-type: none"> <li>• The following may occur: stridor, hoarseness, snoring or rattling secretions</li> </ul> <p><b>Obstructed?</b></p> <ul style="list-style-type: none"> <li>• No or very little air exchange</li> <li>• Movement of the thorax does not mean that the airways are free</li> </ul><br><p><b>Saturation &lt;94</b></p> <ul style="list-style-type: none"> <li>• Is the respiratory rate normal for the child's age?</li> <li>• What type of respiratory movements (shallow/deep)</li> <li>• How is the respiration (inhalation, use of auxiliary muscles, prolonged expiration, movement of the nostrils)</li> </ul> <p>See the respiration symptom card</p> <ul style="list-style-type: none"> <li>• How is the depth of the respiration - Tidal volume</li> <li>-</li> </ul> | <ul style="list-style-type: none"> <li>• Reduced level of consciousness (tongue falls back)</li> <li>• Foreign objects</li> <li>• Swelling of the mouth, throat, neck</li> </ul><br><ul style="list-style-type: none"> <li>• Asthma</li> <li>• RSV or other viral airway infection</li> <li>• Pneumonia</li> <li>• Sepsis</li> <li>• Fever</li> <li>• Reduced level of consciousness</li> <li>• Pneumothorax, pulmonary congestion, pulmonary oedema</li> </ul> | <ul style="list-style-type: none"> <li>• Open airways: positioning of the head and jaw lift</li> <li>• Provide oxygen until saturation exceeds 95% (mask with reservoir or nasal oxygen catheter)</li> <li>• Suction in case of secretion issues</li> <li>• Change in position?</li> <li>• Remove any visible foreign bodies</li> <li>• Consider adrenaline inhalation in case of stridor</li> </ul><br><ul style="list-style-type: none"> <li>• Provide oxygen until saturation exceeds 95% (mask with reservoir or nasal oxygen catheter)</li> <li>• Change in position?</li> <li>• Inhalation with, e.g., beta2-agonist</li> <li>• Mask ventilation if:                             <ul style="list-style-type: none"> <li>- saturation decreases despite oxygen provision</li> <li>- respiration is failing</li> </ul> </li> <li>• Consider inserting a ventricular probe</li> <li>• Consider the acid-base status</li> </ul> <p style="text-align: right;"><i>Re-assess A-B go to C</i></p> |
| <p><b>B Respiration</b></p> | <p><b>Is the pulse normal for the child's age?</b></p> <ul style="list-style-type: none"> <li>• How is central and peripheral pulse quality</li> <li>• Is the pulse irregular</li> <li>• How does the skin look (pale, cyanotic, flushed)</li> <li>• What is the central capillary refill time (normal ≤ 2 sec)</li> <li>• What is the blood pressure</li> <li>• Signs of hepatic enlargement</li> </ul>                                                                                                                                                                                                                                                                                                                                                                                                                                                                                                                                                                                         | <ul style="list-style-type: none"> <li>• Dehydration</li> <li>• Infection</li> <li>• Heart issues</li> <li>• Haemorrhage</li> <li>• Sepsis</li> <li>• Anaphylaxis/medicine-/blood reaction</li> </ul>                                                                                                                                                                                                                                                           | <ul style="list-style-type: none"> <li>• Provide oxygen until the saturation exceeds 95% (mask with reservoir or nasal oxygen catheter)</li> <li>• Acid-base status with lactate</li> <li>• Trendelenburg</li> <li>• IV access + liquid bolus</li> <li>• IO access + liquid bolus</li> <li>• Blood transfusion (in case of haemorrhage)</li> <li>• Cardiac arrest-equipment</li> <li>• ECG</li> <li>• Weight</li> </ul>                                                                                                                                                                                                                                                                                                                                                                                                                                                                                                                                                                          |
|                             |                                                                                                                                                                                                                                                                                                                                                                                                                                                                                                                                                                                                                                                                                                                                                                                                                                                                                                                                                                                                  |                                                                                                                                                                                                                                                                                                                                                                                                                                                                 |                                                                                                                                                                                                                                                                                                                                                                                                                                                                                                                                                                                                                                                                                                                                                                                                                                                                                                                                                                                                  |

|                                 |                                                                                                                                                                                                                                                                                                                                                                                                                                                                                                     |                                                                                                                                                                                                                                         |                                                                                                                                                                                                                                                                                                                                                                                                                                                                                                                                                                                                                                                                            |
|---------------------------------|-----------------------------------------------------------------------------------------------------------------------------------------------------------------------------------------------------------------------------------------------------------------------------------------------------------------------------------------------------------------------------------------------------------------------------------------------------------------------------------------------------|-----------------------------------------------------------------------------------------------------------------------------------------------------------------------------------------------------------------------------------------|----------------------------------------------------------------------------------------------------------------------------------------------------------------------------------------------------------------------------------------------------------------------------------------------------------------------------------------------------------------------------------------------------------------------------------------------------------------------------------------------------------------------------------------------------------------------------------------------------------------------------------------------------------------------------|
|                                 |                                                                                                                                                                                                                                                                                                                                                                                                                                                                                                     |                                                                                                                                                                                                                                         | <ul style="list-style-type: none"> <li>• Prostaglandin on suspicion of ductal-dependent heart condition</li> <li>• Is there a difference between the saturation or blood pressure in both arms and legs</li> </ul> <p style="text-align: right;"><i>Re-assess A-B-C go to D</i></p>                                                                                                                                                                                                                                                                                                                                                                                        |
| <b>D Level of consciousness</b> | <p><b>Normal level of consciousness?</b></p> <ul style="list-style-type: none"> <li>• Observe the level of consciousness (AVPU; Alert, responds to Voice, Pain or Unresponsive)</li> <li>• Pupils (same/different, small/large)</li> <li>• Tonus</li> <li>• Stiffness of the neck and back</li> <li>• Blood glucose</li> <li>• Sudden change in consciousness/behaviour</li> <li>• Changed pattern of movement (same/different for each side)</li> <li>• Headache</li> <li>• Convulsions</li> </ul> | <ul style="list-style-type: none"> <li>• O2 deficiency</li> <li>• High CO2</li> <li>• Low BP</li> <li>• High/low BG</li> <li>• Electrolyte disturbances</li> <li>• Intoxication (medication, alcohol)</li> <li>• Head trauma</li> </ul> | <ul style="list-style-type: none"> <li>• Provide oxygen until saturation exceeds 95% (mask with reservoir or nasal oxygen catheter)</li> <li>• Target BS</li> <li>• Glucose 10% in case of low blood sugar</li> <li>• In case of reduced consciousness corresponding to V on the AVPU perform full GCS test</li> <li>• In case of reduced consciousness corresponding to P on the AVPU or GCS &lt; 9, consider ventilation by mask and intubation</li> <li>• Consider antidote</li> <li>• Neurological assessment</li> <li>• Other examination such as: lumbar puncture, CT or blood samples</li> </ul> <p style="text-align: right;"><i>Re-assess A-B-C-D go to E</i></p> |
| <b>E Exposure</b>               | <p><b>Temperature</b></p> <ul style="list-style-type: none"> <li>• Are there factors that affect the patient? Lift the covers and look at the whole patient.</li> <li>• Infection count?</li> <li>• Electrolytes</li> <li>• Blood glucose</li> <li>• Lactate</li> </ul>                                                                                                                                                                                                                             | <ul style="list-style-type: none"> <li>• Infection/sepsis</li> <li>• Cooling</li> <li>• Trauma</li> <li>• Lactate, base excess and pH are affected by lack of oxygen at the cellular level</li> </ul>                                   | <ul style="list-style-type: none"> <li>• Search for infectious focus</li> <li>• Antibiotics</li> <li>• Expose/undress the patient</li> </ul> <p style="text-align: right;"><i>Re-assess A-B-C-D-E</i></p>                                                                                                                                                                                                                                                                                                                                                                                                                                                                  |
