# Supplementary material for: A multicentre, randomised intervention study of the Paediatric Early Warning Score: study protocol for a randomised controlled trial
Source: Springer Nature journal article supplement (doi:10.1186/s13063-017-2011-7), 2017-06-08
Supplement: MOESM3 [file 12351522]

## The participating departments

### Aarhus University Hospital.

- Department of Paediatrics and Adolescents Health
- Department of children's Orthopaedics

### Herning Regional Hospital:

- Department of Paediatrics
- Emergency Department

### Randers Regional Hospital:

- Department of Paediatrics

### Viborg Regional Hospital:

- Department of paediatrics
